# Supplementary material
Source: publisher site journal article supplement (https://www.dovepress.com/article/274015)
Supplement: Supplementary file 1 [file get_supplementary_file.php]

Supplementary Table 1 Characteristics of respondents

| <b>Sample description</b>                | <b>PEM Adult Inpatient</b> |                |
|------------------------------------------|----------------------------|----------------|
|                                          | <b>N=411</b>               | <b>Valid %</b> |
| Male                                     | 219                        | 55.9           |
| Female                                   | 173                        | 44.1           |
| <i>Age</i>                               |                            |                |
| 16-20                                    | 6                          | 1.5            |
| 21-30                                    | 17                         | 4.3            |
| 31-40                                    | 34                         | 8.7            |
| 41-50                                    | 57                         | 14.5           |
| 51-60                                    | 100                        | 25.5           |
| 61-70                                    | 111                        | 28.3           |
| > 70                                     | 67                         | 17.1           |
| <i>Educational level</i>                 |                            |                |
| Early childhood education                | 1.6                        | 6              |
| Primary school                           | 2.4                        | 9              |
| Lower secondary education                | 14.8                       | 55             |
| Upper secondary education                | 35.5                       | 146            |
| Tertiary education                       | 7.3                        | 30             |
| Bachelor's/ Master's or equivalent level | 21.7                       | 89             |
| Doctoral or equivalent level             | 9                          | 37             |

Supplementary Figure 1 Flowchart of excluded questions

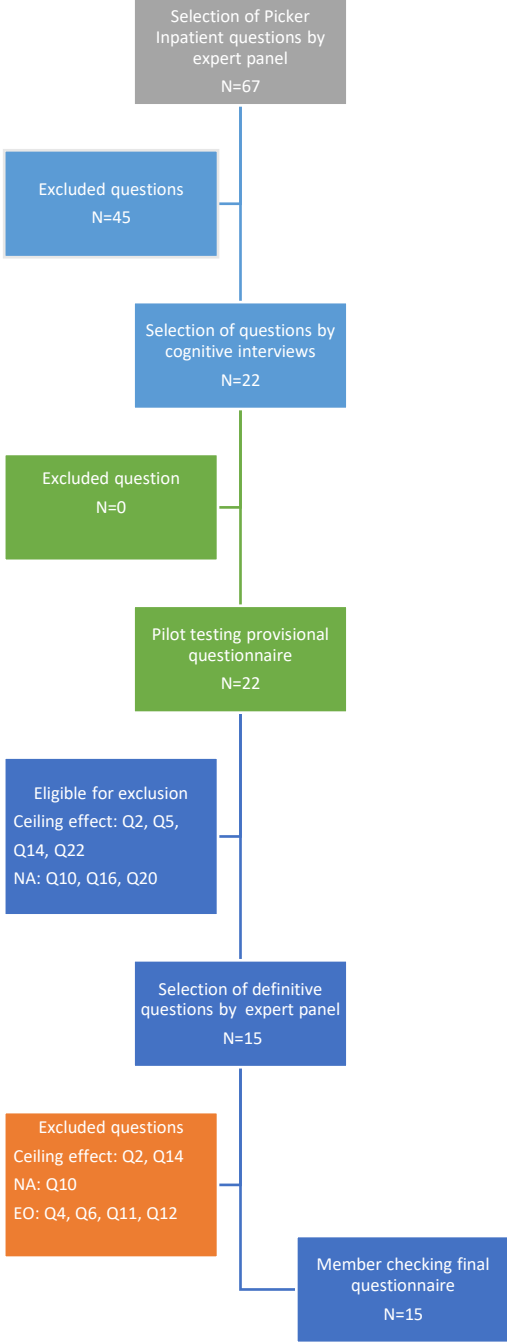

Q1-22=Questions selected by expert team (Supplementary Table 2); NA=Not Applicable>40%; EO=Expert Opinion

Supplementary Table 2 Statistical characteristics of items

| Picker Principle | Questions selected by expert team Adult Inpatient                                                                              | Ceiling<br>>90%<br>Positive<br>answers | Floor<br>>90%<br>negative<br>answers | Mis-<br>sing<br>>10% | Do not<br>know<br>>10% | NA<br>>40% |
|------------------|--------------------------------------------------------------------------------------------------------------------------------|----------------------------------------|--------------------------------------|----------------------|------------------------|------------|
| FA, ES           | Q1 Often people have to go onto a waiting list. What did you think about the time you had to wait? **                          | 53.1                                   | 16.2                                 | 0.5                  | n/a                    | 36.3       |
| CI               | Q2 Did the hospital staff tell you what was going to happen to you?                                                            | 90.8*                                  | 1.2                                  | 1.0                  | 1.5                    | n/a        |
| CC, ET           | Q3 Did the doctors know what was written in your medical records? **                                                           | 89.3                                   | 1.0                                  | 1.7                  | 1.0                    | 3.9        |
| IR, CI, ES       | Q4 If you had a question for the doctor did you understand what he told you? ("go to")                                         | 87.7                                   | 0.8                                  | 5.4                  | 0.5                    | 2.9        |
| ET               | Q5 Did you trust the doctors? ("go to") **                                                                                     | 91.5*                                  | 0.3                                  | 5.4                  | n/a                    | n/a        |
| IR, CI, ES       | Q6 When you had a question for the nurses did you understand what they told you?                                               | 88.8                                   | 1.3                                  | 1.5                  | n/a                    | 5.1        |
| ET               | Q7 Did you trust the nurses? **                                                                                                | 81.6                                   | 1.7                                  | 1.0                  | n/a                    | n/a        |
| ET, AN           | Q8 Did the nurses have enough time to care for you? **                                                                         | 61.7                                   | 8.1                                  | 1.0                  | n/a                    | n/a        |
| CC, CI           | Q9 Sometimes in a hospital, staff will say different things which could leave you feeling confused. Did this happen to you? ** | 4.9                                    | 69.9                                 | 1.5                  | n/a                    | n/a        |
| ES               | Q10 Were you able to talk to anyone at the hospital about your problems or worries?                                            | 68.5                                   | 12.5                                 | 1.7                  | n/a                    | 53.5*      |
| ES               | Q11 When you were talking to the doctors or the nurses could other people hear what you were saying?                           | 74.1                                   | 3.7                                  | 2.2                  | 4.9                    | n/a        |
| ET, AN           | Q12 How clean was the hospital room you stayed in?                                                                             | 59.3                                   | 0.2                                  | 1.2                  | 0.7                    | n/a        |
| IR               | Q13 Were you involved in the decisions about your treatment? **                                                                | 83.4                                   | 6.9                                  | 2.2                  | 2.4                    | 25.1       |
| ET               | Q14 Did the doctors and nurses do everything they could to control any pain you may have had?                                  | 94.0*                                  | 0.0                                  | 2.4                  | n/a                    | 17         |
| IR, CI           | Q15 Did anyone at the hospital explain to you the pros and cons of the treatment? **                                           | 84.3                                   | 2.3                                  | 2.4                  | n/a                    | 12.4       |
| CC, CI           | Q16 Did a member of staff tell to you about possible and side-effects you could have from any new medication? **               | 69.4                                   | 17.7                                 | 2.9                  | n/a                    | 46.2*      |
| CC, IR           | Q17 Did the hospital staff involve you in the decision about leaving the hospital/ your discharge? **                          | 75.7                                   | 7.9                                  | 3.4                  | 1.9                    | 29.7       |
| CC, CI           | Q18 Did anyone from the hospital explain to you about any problems you needed to be aware of when you got home? **             | 76.9                                   | 10.8                                 | 3.6                  | n/a                    | 13.1       |
| IF, CC           | Q19 Did someone at the hospital tell your family or someone close everything, so that they could look after you properly? **   | 74.5                                   | 10.9                                 | 3.6                  | 1.7                    | 28.0       |
| CC, CI           | Q20 Did anyone at the hospital talk to you about aftercare? E.g., aftercare from your GP, physiotherapist, nursing home? **    | 66.0                                   | 18.6                                 | 3.6                  | 1.9                    | 48.7*      |
| ES               | Q21 Did you feel that the hospital staff treated you with respect? **                                                          | 87.4                                   | 0.8                                  | 3.6                  | n/a                    | n/a        |
| AN, ES           | Q22 Did you feel safe in hospital? **                                                                                          | 92.1*                                  | 1.3                                  | 4.4                  | n/a                    | n/a        |

FA=Fast Access to reliable healthcare; ET=Effective treatment and trusted professionals; CC=Continuity of care and smooth transitions; IR=Involvement in decisions and respect for preferences, needs and values; CI=Clear information and support for self-care; IF=Involvement of and support for family and friends; ES=Emotional support, empathy and respect; AN=Attention for physical and environmental needs; NA=Not Applicable (it was not necessary/ I don't need to/ I didn't have to/ I didn't spoke to); n/a=not applicable, go to=routing question; \*=item eligible for exclusion; \*\*=final selected item

Supplementary Table 3 Spearman correlation coefficients between final selected items

|     | Q1  | Q3    | Q5    | Q7    | Q8     | Q9    | Q13   | Q15   | Q16   | Q17   | Q18   | Q19   | Q20   | Q21   | Q22   |
|-----|-----|-------|-------|-------|--------|-------|-------|-------|-------|-------|-------|-------|-------|-------|-------|
|     |     | 0,072 | 0,145 | 0,151 | -0,021 | 0,083 | 0,192 | 0,067 | 0,029 | 0,049 | 0,166 | 0,265 | 0,284 | 0,298 | 0,204 |
| Q1  | 256 |       | 0,370 | 0,441 | 0,072  | 0,227 | 0,298 | 0,370 | 0,346 | 0,247 | 0,409 | 0,358 | 0,285 | 0,370 | 0,242 |
| Q3  | 244 | 378   |       | 0,472 | 0,061  | 0,365 | 0,266 | 0,328 | 0,225 | 0,342 | 0,302 | 0,352 | 0,289 | 0,395 | 0,276 |
| Q5  | 256 | 378   | 399   |       | 0,097  | 0,277 | 0,611 | 0,536 | 0,226 | 0,379 | 0,447 | 0,623 | 0,527 | 0,355 | 0,214 |
| Q7  | 120 | 175   | 183   | 183   |        | 0,089 | 0,027 | 0,030 | 0,048 | 0,160 | 0,005 | 0,039 | 0,001 | 0,093 | 0,117 |
| Q8  | 242 | 357   | 377   | 173   | 377    |       | 0,178 | 0,182 | 0,163 | 0,199 | 0,189 | 0,138 | 0,023 | 0,298 | 0,225 |
| Q9  | 254 | 376   | 397   | 183   | 377    | 397   |       | 0,423 | 0,194 | 0,332 | 0,268 | 0,354 | 0,232 | 0,290 | 0,227 |
| Q13 | 186 | 274   | 288   | 147   | 276    | 287   | 288   |       | 0,275 | 0,172 | 0,393 | 0,306 | 0,424 | 0,300 | 0,226 |
| Q15 | 235 | 333   | 349   | 167   | 331    | 347   | 267   | 349   |       | 0,300 | 0,421 | 0,383 | 0,336 | 0,189 | 0,141 |
| Q16 | 126 | 203   | 208   | 119   | 200    | 208   | 161   | 196   | 208   |       | 0,389 | 0,334 | 0,317 | 0,167 | 0,119 |
| Q17 | 174 | 258   | 266   | 129   | 256    | 266   | 208   | 244   | 154   | 266   |       | 0,633 | 0,522 | 0,313 | 0,165 |
| Q18 | 232 | 324   | 341   | 158   | 321    | 339   | 254   | 308   | 198   | 242   | 341   |       | 0,648 | 0,248 | 0,224 |
| Q19 | 195 | 262   | 273   | 132   | 257    | 272   | 205   | 254   | 171   | 201   | 260   | 273   |       | 0,200 | 0,141 |
| Q20 | 113 | 182   | 187   | 98    | 179    | 187   | 137   | 168   | 127   | 149   | 176   | 164   | 187   |       | 0,378 |
| Q21 | 252 | 371   | 392   | 178   | 371    | 390   | 285   | 345   | 207   | 265   | 340   | 273   | 187   | 392   |       |
| Q22 | 250 | 369   | 389   | 177   | 368    | 387   | 283   | 342   | 206   | 263   | 337   | 270   | 186   | 389   | 389   |

PEM Adult Inpatient

Note: Correlations are in the right-upper triangle, numbers in the left-lower triangle
